# Supplementary material for: Kinematics and control of a cable-driven snake-like manipulator for underwater application
Source: Copernicus journal article supplement (doi:10.5194/ms-13-495-2022), 2022-06-07
Supplement: Supplementary file 1 [file ms-13-495-2022-supplement.zip]

Archive with 4 entries (3 files):
- Tip-following/
- Tip-following/tip-following2dfor MS1.mp4
- Tip-following/tip-following3d.mp4
- ms-13-495-2022-supplement-title-page.pdf
