# Supplementary material for: Kinematics and control of a cable-driven snake-like manipulator for underwater application
Source: Copernicus journal article supplement (doi:10.5194/ms-13-495-2022), 2022-06-07
Supplement: Supplementary file 1 [file ms-13-495-2022-supplement.zip › ms-13-495-2022-supplement-title-page.pdf]

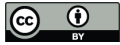

## *Supplement of*

# **Kinematics and control of a cable-driven snake-like manipulator for underwater application**

**Fufeng Xue and Zhimin Fan**

*Correspondence to:* Zhimin Fan (zmfan@163.com)

- ms-13-495-2022-supplement-title-page.pdf
- Tip-following
  - tip-following2dfor MS1.mp4
  - tip-following3d.mp4

The copyright of individual parts of the supplement might differ from the article licence.
